# Supplementary material for: Increasing turbidity in the North Sea during the 20 th century due tochanging wave climate
Source: Copernicus journal article supplement (doi:10.5194/os-2019-52), 2019-06-11
Supplement: Supplementary file [file os-2019-52-AC4-supplement.pdf]

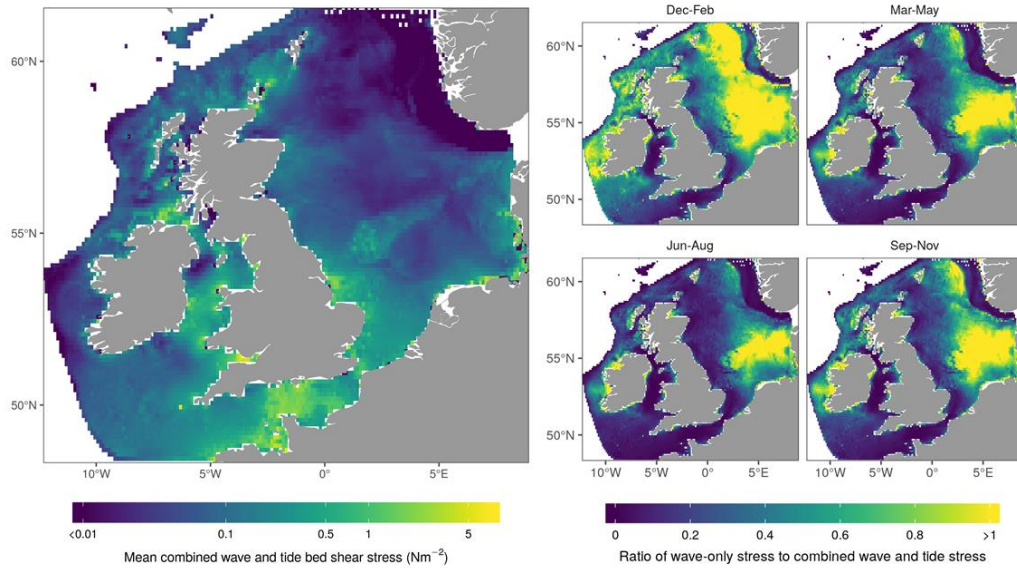

**Figure. Left: Annual mean of combined wave and tide bed shear stress for 1997-2017. Right: ratio of mean wave-only stress to combined wave and tide stress. Regions with high ratios are wave-dominated, whereas regions with low ratios are tide-dominated. Bed shear stress was calculated using the equations of Soulsby and Clarke (2005) and tidal inputs from the Scottish Shelf Model and wave inputs from the ERA-interim reanalysis.**

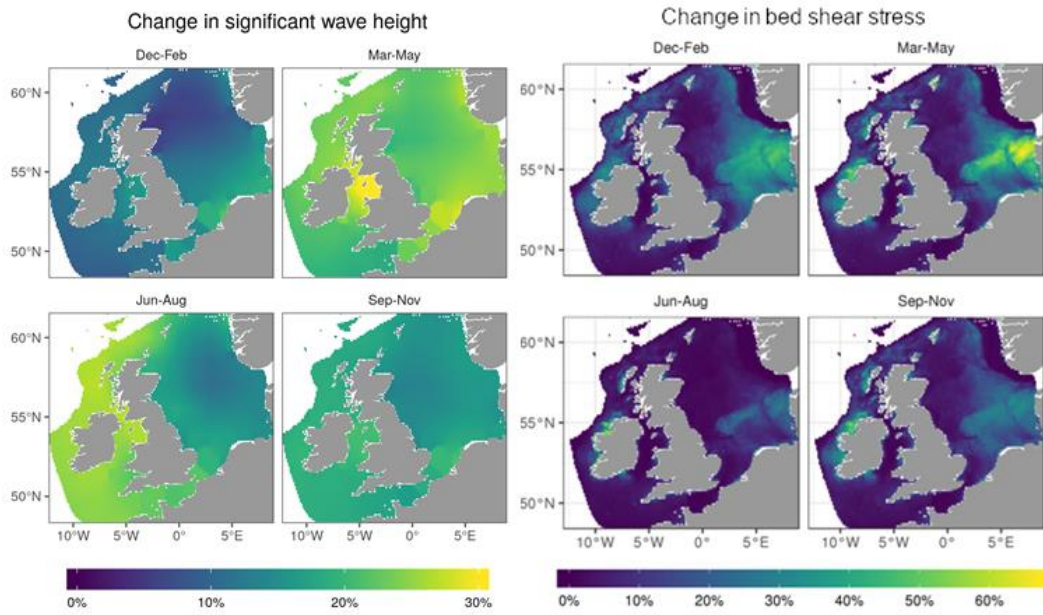

**Figure. Left: changes in seasonal mean significant wave height over the 20<sup>th</sup> century. Right: changes in seasonal bed shear stress over the 20<sup>th</sup> century. Changes shown are between the climatological periods 1910-1929 and 1990 and 2009. Bed shear stress was calculated over the 20<sup>th</sup> century using the ERA20c wave reanalysis and present day tidal conditions, with significant wave height calculated using the ERA20c reanalysis wave heights.**
